# Supplementary material
Source: PubMed Central journal article supplement (PMC3529378)
Supplement: supp_en.2012-1835v1_EN-12-1835_Supplemental_Data.pdf [file supp_en.2012-1835v1_EN-12-1835_Supplemental_Data.pdf]

## Supplemental Material

**Supplemental Table 1.** *In vivo* cardiac functions in twelve and fifteen wk old wild type (WT) and db/db mice evaluated by cine-MRI.

| Parameter                                              | Main Effects | P value | Wt                  | db/db        | Wt                       | db/db       |
|--------------------------------------------------------|--------------|---------|---------------------|--------------|--------------------------|-------------|
|                                                        |              |         | (7)                 | (7)          | (8)                      | (12)        |
|                                                        |              |         | <u>12 wk of age</u> |              | <u>15 wk of age</u>      |             |
| Body Mass (g)                                          | Strain       | 0.001   |                     |              |                          |             |
|                                                        | Age          | 0.002   | 25.8 ± 0.53*        | 44.0 ± 1.7§  | 29.2 ± 0.6†              | 49.6 ± 1.4  |
|                                                        | Interaction  | 0.395   |                     |              |                          |             |
| Heart Rate (bpm)                                       | Strain       | 0.010   |                     |              |                          |             |
|                                                        | Age          | 0.553   | 469 ± 14*           | 381 ± 20     | 461 ± 29                 | 418 ± 23    |
|                                                        | Interaction  | 0.369   |                     |              |                          |             |
| <u>Volumes</u>                                         |              |         |                     |              |                          |             |
| End Diastolic Volume (μl)                              | Strain       | 0.069   |                     |              |                          |             |
|                                                        | Age          | 0.849   | 49.1 ± 3.4          | 49.1 ± 1.7   | 53.7 ± 1.8†              | 43.4 ± 2.8  |
|                                                        | Interaction  | 0.071   |                     |              |                          |             |
| End Systolic Volume (μl)                               | Strain       | 0.015   |                     |              |                          |             |
|                                                        | Age          | 0.130   | 17.2 ± 1.6‡         | 16.1 ± 1.9   | 22.7 ± 1.5†              | 15.6 ± 1.3  |
|                                                        | Interaction  | 0.066   |                     |              |                          |             |
| Stroke Volume (μL)                                     | Strain       | 0.569   |                     |              |                          |             |
|                                                        | Age          | 0.114   | 31.9 ± 2.0          | 32.9 ± 1.4   | 31.0 ± 1.5               | 27.9 ± 1.9  |
|                                                        | Interaction  | 0.270   |                     |              |                          |             |
| <u>Systolic Indices</u>                                |              |         |                     |              |                          |             |
| Cardiac Output (ml•min <sup>-1</sup> )                 | Strain       | 0.010   |                     |              |                          |             |
|                                                        | Age          | 0.432   | 14.9 ± 0.9          | 12.4 ± 0.4   | 14.3 ± 1.2†              | 11.5 ± 0.9  |
|                                                        | Interaction  | 0.868   |                     |              |                          |             |
| Cardiac Index (ml•min <sup>-1</sup> •g <sup>-1</sup> ) | Strain       | 0.001   |                     |              |                          |             |
|                                                        | Age          | 0.010   | 0.58 ± 0.03‡*       | 0.28 ± 0.01  | 0.49 ± 0.3†              | 0.23 ± 0.02 |
|                                                        | Interaction  | 0.456   |                     |              |                          |             |
| Ejection Fraction (%)                                  | Strain       | 0.050   |                     |              |                          |             |
|                                                        | Age          | 0.019   | 65.3 ± 1.4‡         | 67.4 ± 2.9   | 57.8 ± 2.5†              | 64.3 ± 1.6  |
|                                                        | Interaction  | 0.318   |                     |              |                          |             |
| Peak Ejection Rate (μL•ms <sup>-1</sup> )              | Strain       | 0.017   |                     |              |                          |             |
|                                                        | Age          | 0.637   | 0.96 ± 0.04         | 0.80 ± 0.04  | 0.94 ± 0.11†             | 0.74 ± 0.06 |
|                                                        | Interaction  | 0.776   |                     |              |                          |             |
| <u>Diastolic Indices</u>                               |              |         |                     |              |                          |             |
| Initial Filling Rate (μL•ms <sup>-1</sup> )            | Strain       | 0.049   |                     |              |                          |             |
|                                                        | Age          | 0.001   | 0.61 ± 0.10‡        | 0.50 ± 0.06§ | 0.34 ± 0.06 <sup>α</sup> | 0.19 ± 0.03 |
|                                                        | Interaction  | 0.715   |                     |              |                          |             |
| Peak Filling Rate (μL•ms <sup>-1</sup> )               | Strain       | 0.009   |                     |              |                          |             |
|                                                        | Age          | 0.846   | 1.01 ± 0.08         | 0.87 ± 0.06  | 1.07 ± 0.06†             | 0.78 ± 0.07 |
|                                                        | Interaction  | 0.315   |                     |              |                          |             |
| Diastolic Relaxation Time                              | Strain       | 0.009   |                     |              |                          |             |
|                                                        | Age          | 0.058   | 27.2 ± 3.1          | 32.3 ± 2.0§  | 29.7 ± 2.3†              | 40.5 ± 3.7  |

(ms) Interaction 0.254

---

\*P<0.05 strain within 12 wk; † P<0.05 strain within 15 wk; ‡ P<0.05 Age within WT; § P<0.05 Age within db/db. <sup>α</sup> P=0.07.

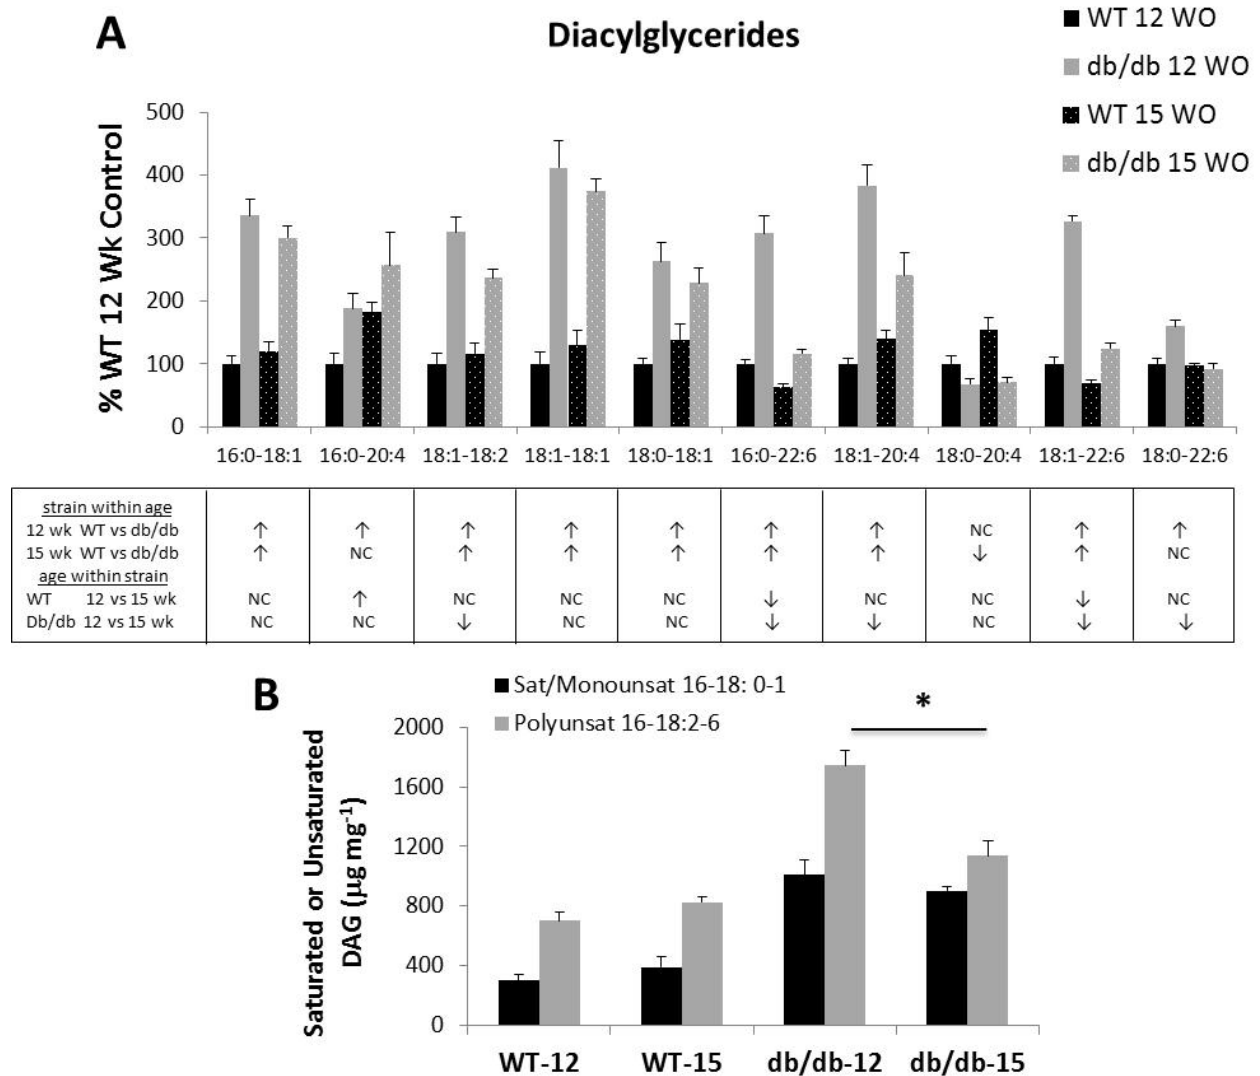

**Supplemental Figure 1.** (A) Diacylglyceride (DAG) accumulation in the hearts of 12 and 15 wk old db/db mice compared to age-matched WT mice. (B) Changes in DAG subspecies composition between the 12 and 15 wk db/db hearts. Black bars represent the sum of saturated and monounsaturated diacylglycerides (DAG) species and gray bars represent the sum of polyunsaturated DAG species in the hearts of 12 and 15 wk old db/db and WT mice. Each bar represents the mean  $\pm$  SE for 5-6 WT or db/db mice. Differences ( $P < 0.05$ ), i.e., increase, no change or decrease, are indicated by  $\uparrow$ , NC, and  $\downarrow$ , respectively in the table below the graph in panel A. Asterisk indicates  $P < 0.05$ .

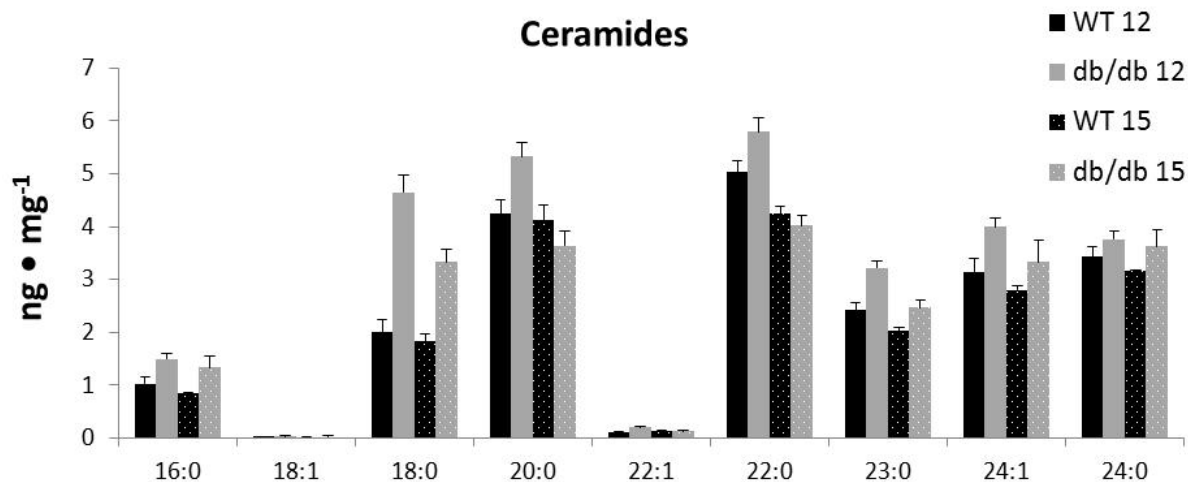

|                          |    |    |    |    |    |    |   |    |    |
|--------------------------|----|----|----|----|----|----|---|----|----|
| <u>strain within age</u> |    |    |    |    |    |    |   |    |    |
| 12 wk WT vs db/db        | ↑  | ↑  | ↑  | ↑  | ↑  | NC | ↑ | ↑  | NC |
| 15 wk WT vs db/db        | ↑  | ↑  | ↑  | NC | NC | NC | ↑ | NC | NC |
| <u>age within strain</u> |    |    |    |    |    |    |   |    |    |
| WT 12 vs 15 wk           | NC | NC | NC | NC | NC | ↓  | ↓ | NC | NC |
| Db/db 12 vs 15 wk        | NC | NC | ↓  | ↓  | ↓  | ↓  | ↓ | NC | NC |

**Supplemental Figure 2.** Ceramides accumulate in the hearts of 12, but not 15 wk old db/db mice compared to age-matched WT mice. Electrospray ionization-mass spectrometry was used to quantify individual lipid species. Each bar represents the mean  $\pm$  SE for five to six WT or db/db mice. Statistical analysis was by Student's *t* test for each lipid subspecies and differences ( $P < 0.05$ ), i.e., increase, no change or decrease, are indicated by  $\uparrow$ , NC, and  $\downarrow$ , respectively in the table below the graph.
